# Supplementary material for: Adjustable bandgap of a type-II AsP/SnS 2 van der Waals heterostructure using strain: outstanding electronic, optical, and photocatalytic properties
Source: Royal Society of Chemistry journal article supplement (doi:10.1039/d5ra07850d), 2025-01-01

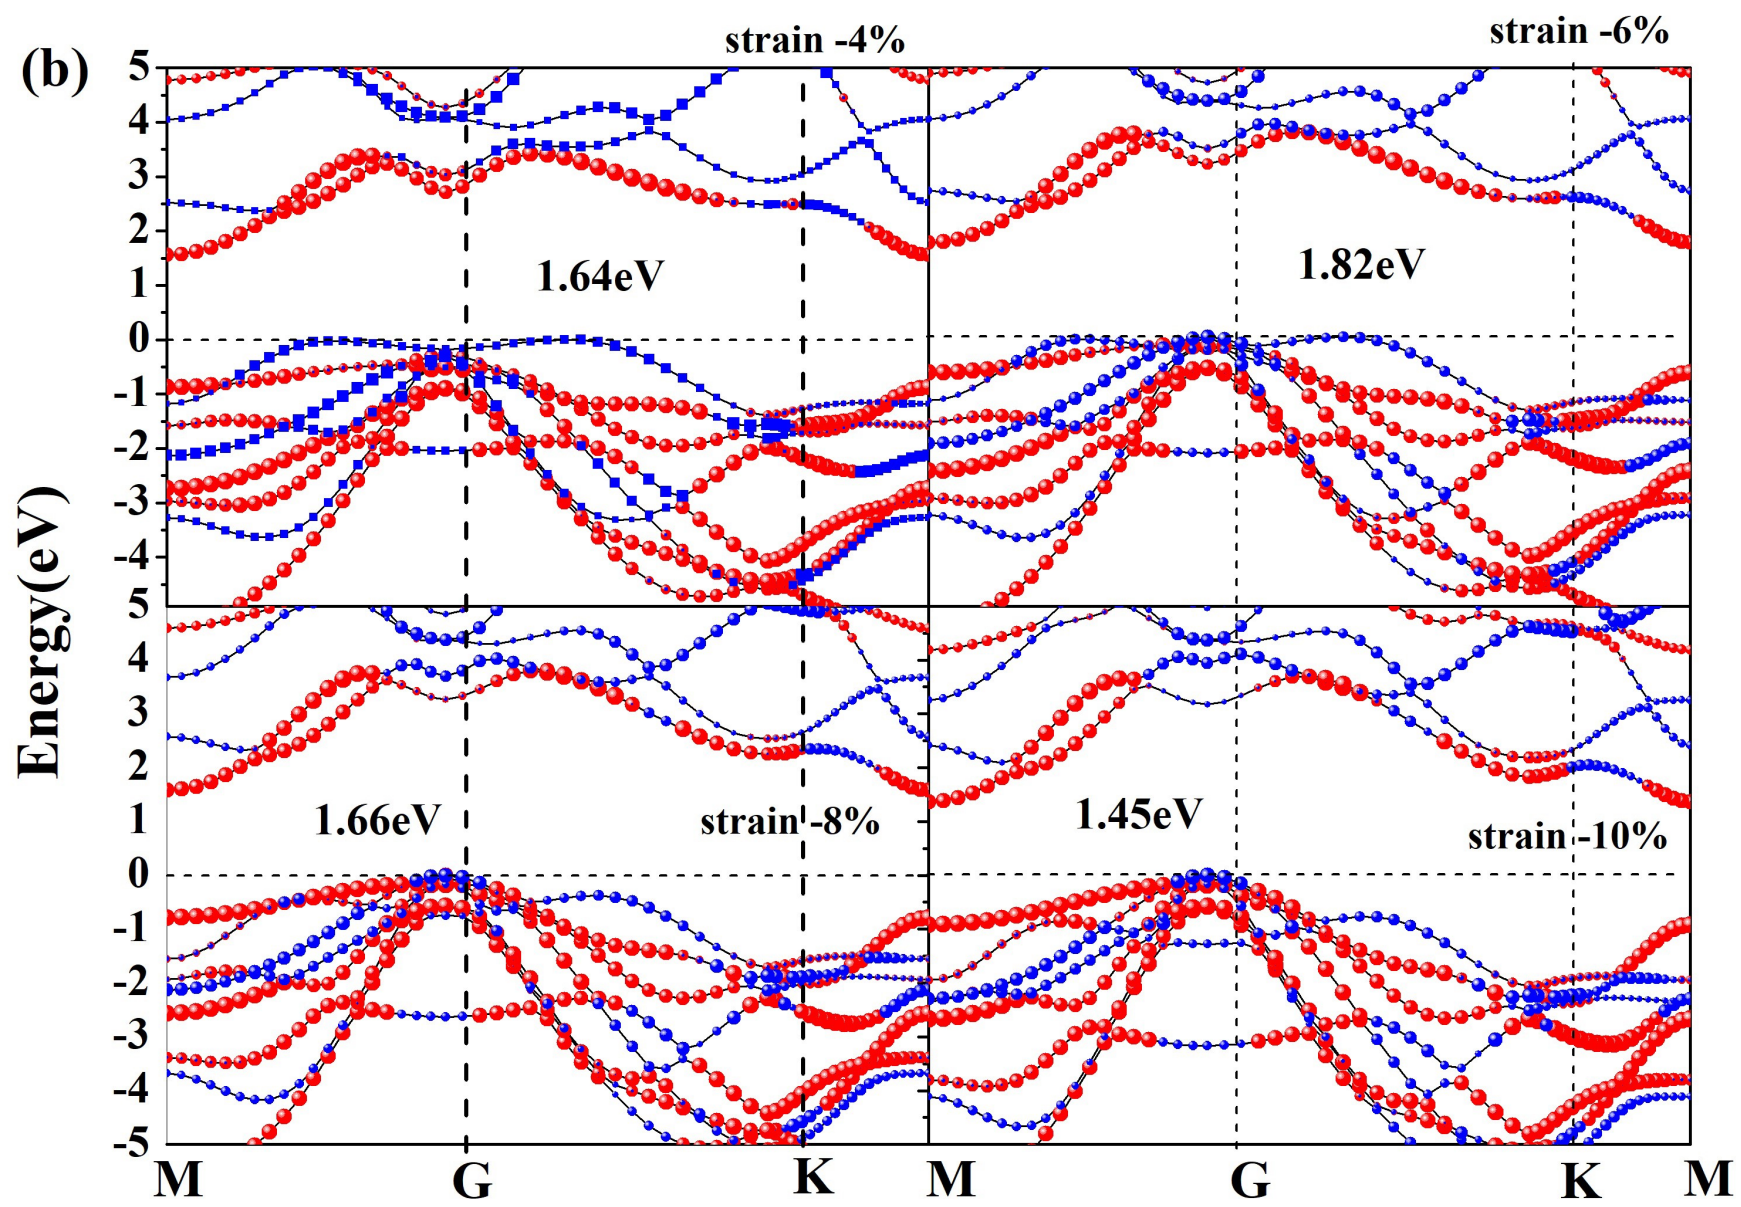

Supplement: d5ra07850d4.pdf [file d5ra07850d4.pdf]
