# Supplementary material for: Adjustable bandgap of a type-II AsP/SnS 2 van der Waals heterostructure using strain: outstanding electronic, optical, and photocatalytic properties
Source: Royal Society of Chemistry journal article supplement (doi:10.1039/d5ra07850d), 2025-01-01
Supplement: d5ra07850d5.pdf [file d5ra07850d5.pdf]

## Supplementary Information

# Adjustable bandgap of type-II AsP/SnS<sub>2</sub> van der Waals heterostructure by the strain: the outstanding electronic, optical, and photocatalytic properties

Dahua Ren<sup>a</sup>, Yao Wen<sup>b</sup>, Zhangyang Zhou<sup>a</sup>, Ming Du<sup>a</sup>, Liushun Wang<sup>a</sup>, and Jinqiao

Yi<sup>a†</sup>

<sup>a</sup>*College of Intelligent Systems Science and Engineering, Hubei Minzu University, Enshi, China, 44500.*

<sup>b</sup>*School of Physics and Technology, Wuhan University, Wuhan 430072, China*

As evidenced by the projected band structures, the reduction in the band gap arises from a downward shift of the conduction band minimum (CBM) at the G point in the SnS<sub>2</sub> layer and an upward shift of the valence band maximum (VBM) along the M→G path in the AsP layer. In the AsP/SnS<sub>2</sub> heterostructure, as depicted in Fig. 1, the VBM is predominantly contributed by the AsP layer, while the CBM is primarily derived from the SnS<sub>2</sub> layer—where the red and blue curves represent the density of states (DOS) of SnS<sub>2</sub> and AsP, respectively. The spatial separation of the VBM and CBM into the AsP and SnS<sub>2</sub> layers clearly indicates a type-II band alignment in the AsP/SnS<sub>2</sub> heterostructure.

---

<sup>†</sup> Corresponding author E-mail address: nanx1013@163.com.

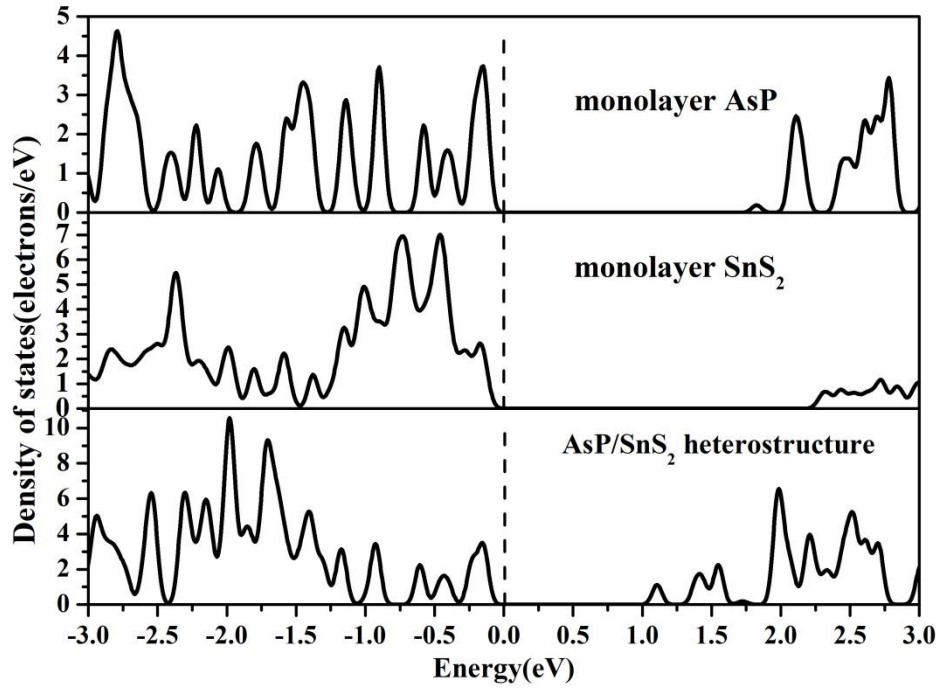

**Fig. 1** Projected density of states (PDOS) of AsP monolayer, SnS<sub>2</sub> monolayer, AsP/SnS<sub>2</sub> heterostructure. Fermi level is set to zero as indicated by the black dashed line.

Strain engineering serves as a fundamental approach for modulating electronic properties by deliberately applying mechanical stress—either tensile or compressive—to induce controlled deformation of the lattice. Under compressive strain from 0% to 6%, the band gap initially increases to 1.82 eV. Under compressive strain from 6% to 10%, the band gap decreases from 1.82 eV to 1.45 eV in Fig. 2. In contrast, under tensile strain increasing from 0% to 8%, the band gap monotonically decreases from 1.24 eV to 0 eV in Fig. 2(a). Under compressive strain, the non-monotonic variation of the band gap can be attributed to competing effects of orbital hybridization and strain-induced band renormalization. At moderate compressive strains, the enhanced interatomic orbital overlap generally increases the crystal field splitting and enlarges the band gap. However, under larger compressive deformation, structural distortions may lower symmetry sufficiently to activate additional band hybridization pathways, particularly between the valence band maximum (VBM) and

conduction band minimum (CBM), often accompanied by changes in the curvature and effective masses of the bands, leading to a reduction in the gap. In contrast, tensile strain increases atomic separation, which diminishes orbital overlap and hopping matrix elements, often resulting in bandgap narrowing.

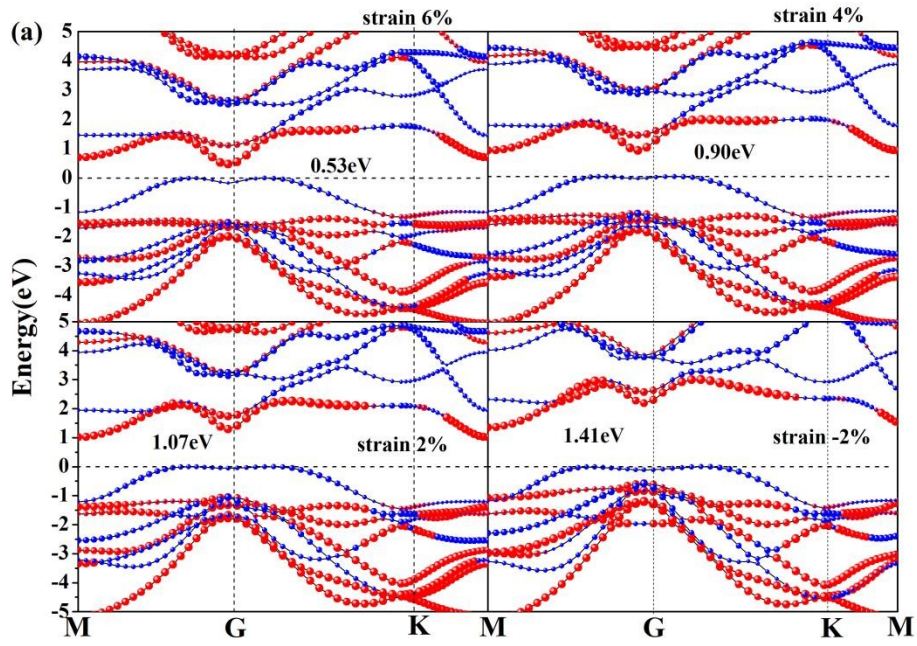

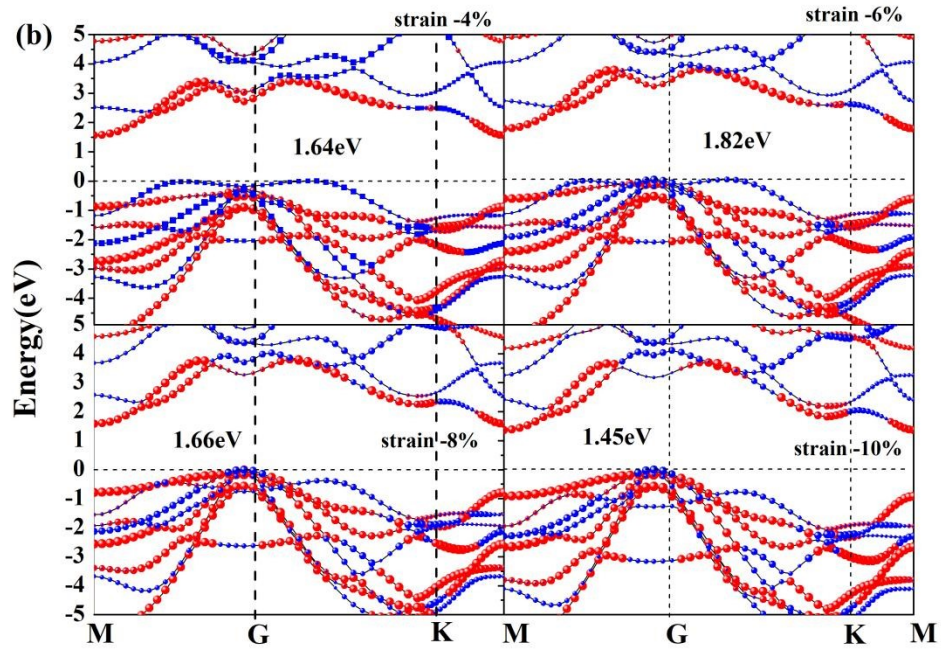

Fig. 2 Band gap of AsP/SnS<sub>2</sub> heterostructure under strain of (a) 6%, 4%, 2% and -2%; (b) -4%, -6%, -8% and -10%.
